# Supplementary material
Source: MDPI journal article supplement (https://www.mdpi.com/2571-6255/6/1/8)
Supplement: s1 [file s1]

# SUPPLEMENTARY MATERIAL

| VARIABLE                     | SOURCE ENTITY                               | FILE NAME                                                                                                                 | FORMAT           | LAST UPDATE     | SCALE                                    |
|------------------------------|---------------------------------------------|---------------------------------------------------------------------------------------------------------------------------|------------------|-----------------|------------------------------------------|
| Fire Frequency               | ICV                                         | Forest fires 1993-2018 (and 2019 provisional)                                                                             | Vectorial (.shp) | 2019            | 1/5.000 (Comunitat Valenciana)           |
|                              | Copernicus Programme                        | CLC2012                                                                                                                   | Vectorial (.shp) | 2012            | 1/100.000 (International)                |
| Litter Carbon Stock          | INIA-CSIC                                   | Forest floor carbon stocks in woodland formations in Spain                                                                | Raster (.tiff)   | 2021            | 250 m (pixel resolution) (National)      |
| Prescribed Burns             | ICV                                         | Approved local burning plans                                                                                              | Vectorial (.shp) | 2020            | 1/25.000 (Comunitat Valenciana)          |
| Vegetation Treatments        |                                             | Vegetation treatments described in the Forest Demarcation Plans                                                           | Vectorial (.shp) | 2017            | 1/5.000 (Comunitat Valenciana)           |
| Firebreaks Network           |                                             | Firebreak areas of the Forest Demarcation Plans                                                                           | Vectorial (.shp) | 2006            | 1/5.000 (Comunitat Valenciana)           |
| Water Supply Network         |                                             | Area of influence of aerial recharge water points of the sectoral plans for the prevention of forest fires of demarcation | Vectorial (.shp) | 2017            | 1/5.000 (Comunitat Valenciana)           |
| Accessibility                |                                             | Vials inventoried and proposed in the Forest Demarcation Plans                                                            | Vectorial (.shp) | 2017            | 1/5.000 (Comunitat Valenciana)           |
| Landscape/Ecosystem          | Copernicus Programme                        | CLC 2018                                                                                                                  | Vectorial (.shp) | 2018            | 1/100.000 (International)                |
|                              |                                             | CLC 2012                                                                                                                  | Vectorial (.shp) | 2012            | 1/100.000 (International)                |
| Fuel Models                  | ICV                                         | Fuel models of Valencian Region                                                                                           | Raster (.tiff)   | 2020            | 1/50.000 (Comunitat Valenciana)          |
|                              | Quilez Moraga, R. and Chinchilla Redon, S.  | Fuel models in Valencian province                                                                                         | Vectorial (.shp) | 2011            | 1/50.000 (Comunitat Valenciana)          |
| Climatology                  | AEMET                                       | Climatic data                                                                                                             | Vectorial (.shp) | Variable (2020) | Spain (Regions)                          |
|                              | Worldwide Bioclimatic Classification System | Bioclimatic Indexes                                                                                                       | Text (.txt)      | 2009            | 30 sec.                                  |
| Slope                        | IGN                                         | MDT25                                                                                                                     | Raster (.asc)    | 2018            | 25 cm (pixel resolution) (International) |
| Orientation                  |                                             | MDT25                                                                                                                     | Raster (.asc)    | 2018            | 25 cm (pixel resolution) (International) |
| Vegetation Carbon Stock 2006 | REMAS Project                               | CHELVA_carbon_stock_2006                                                                                                  | Raster (.tif)    | 2020            | 30 m (pixel resolution) (Regional)       |

# SUPPLEMENTARY MATERIAL

| VARIABLE                                        | SOURCE ENTITY | FILE NAME                         | FORMAT        | LAST UPDATE | SCALE                              |
|-------------------------------------------------|---------------|-----------------------------------|---------------|-------------|------------------------------------|
| <b>Vegetation Carbon Stock 2012 (pre-fire)</b>  | REMAS Project | CHELVA_carbon_stock_2012_prefire  | Raster (.tif) | 2020        | 30 m (pixel resolution) (Regional) |
| <b>Vegetation Carbon Stock 2012 (post-fire)</b> | REMAS Project | CHELVA_carbon_stock_2012_postfire | Raster (.tif) | 2020        | 30 m (pixel resolution) (Regional) |
| <b>Vegetation Carbon Stock 2020</b>             | REMAS Project | CHELVA_carbon_stock_2020          | Raster (.tif) | 2020        | 20 m (pixel resolution) (Regional) |
| <b>Soil Carbon Stock 2012</b>                   | REMAS Project | SOC_stock_2012                    | Raster (.tif) | 1984-2012   | 30 m (pixel resolution) (Regional) |
| <b>Soil Carbon Stock 2012 (pre-fire)</b>        | REMAS Project | Soil carbon map                   | Raster (.tif) | 2020        | 30 m (pixel resolution) (Regional) |
